# Supplementary material
Source: ML conference proceedings conference paper supplement (https://openreview.net/forum?id=mp1rFRgiuc0)

Classification

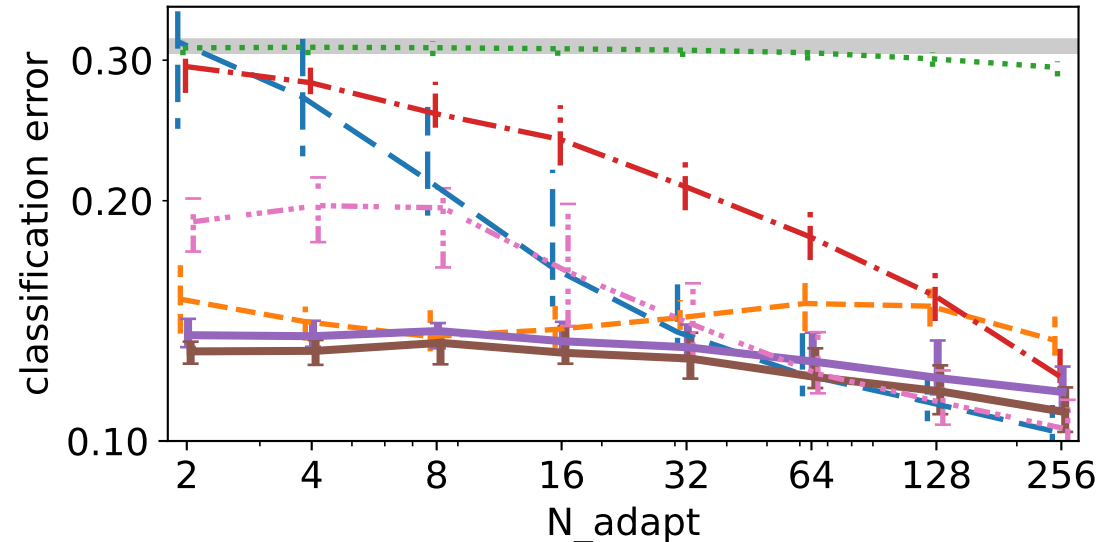

Regression

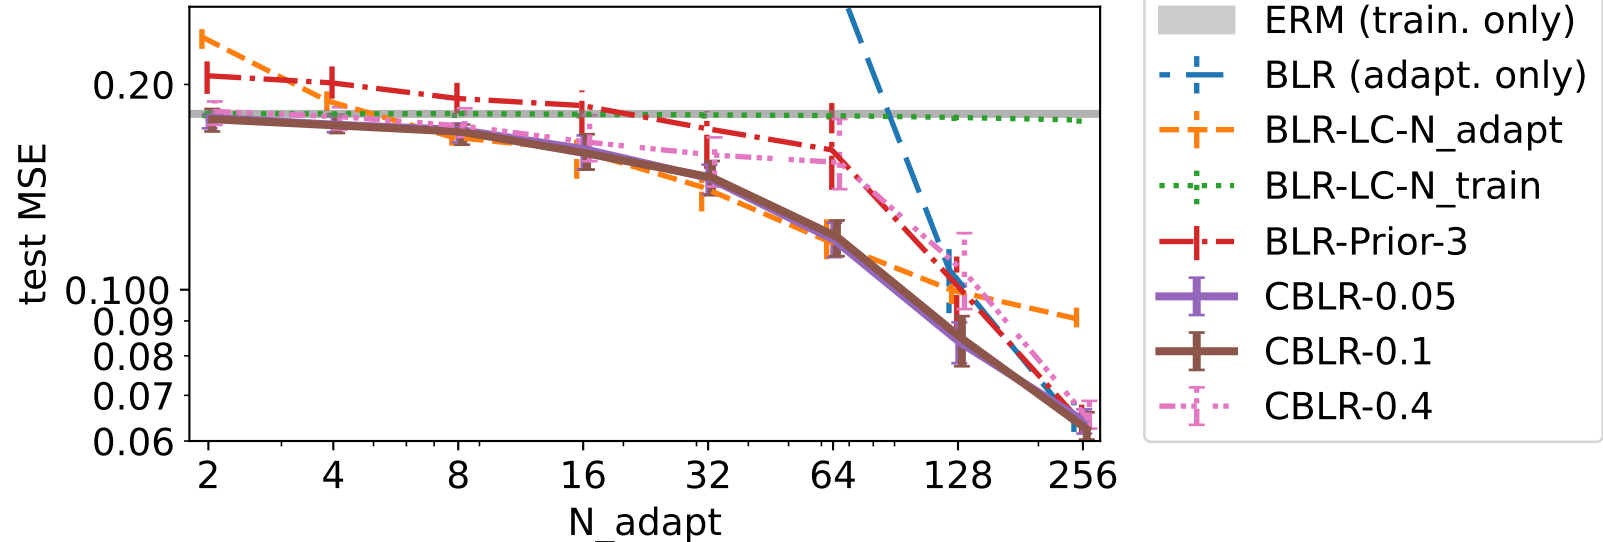

Supplement: supplementary_material [file attachment]

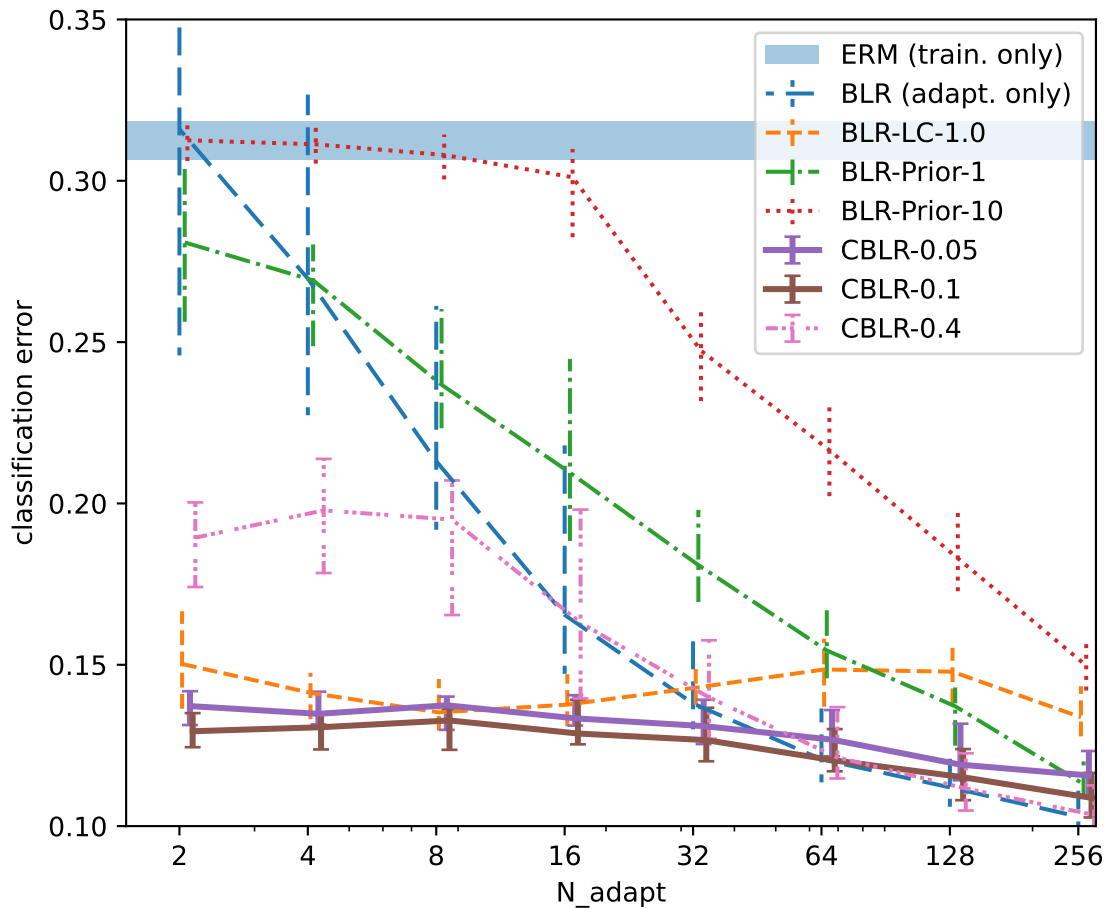

Supplement: supplementary_material [file attachment]

$N_{\text{adapt}} = 8$

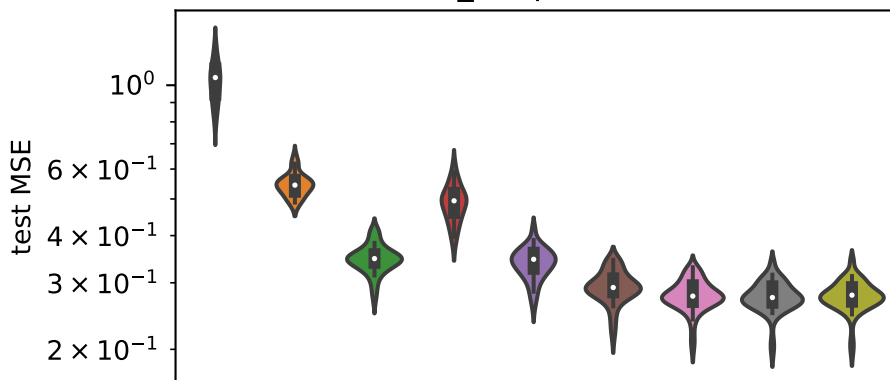

$N_{\text{adapt}} = 64$

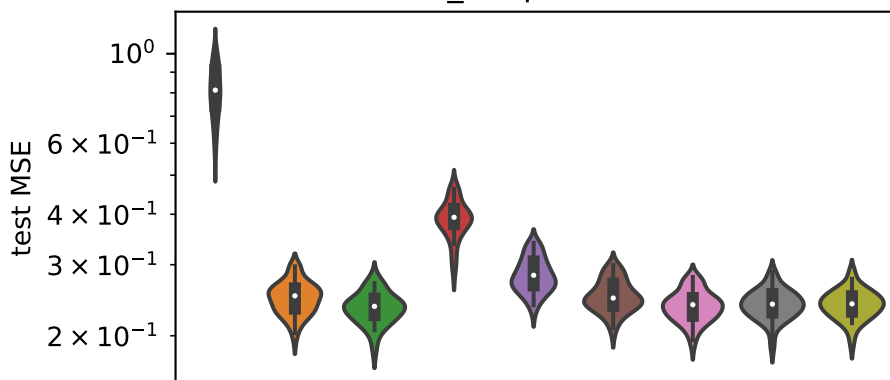

$N_{\text{adapt}} = 512$

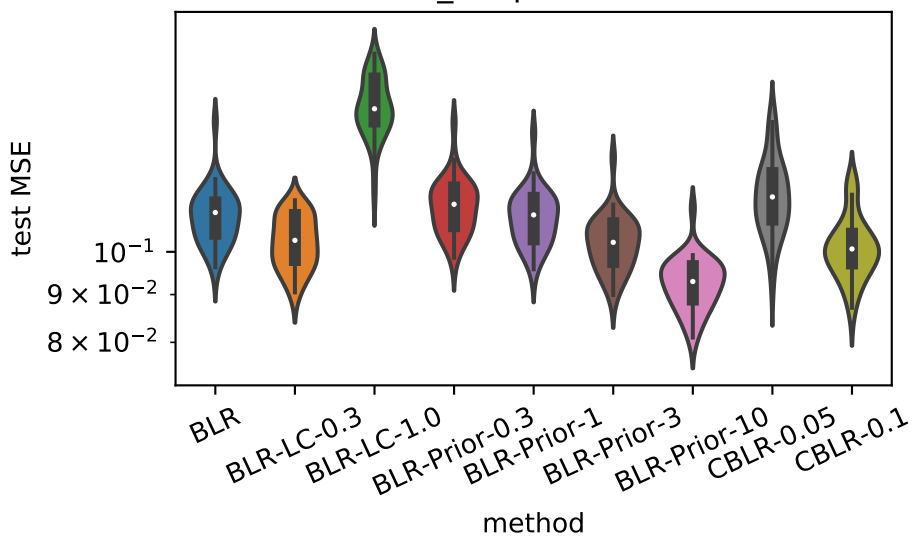

Supplement: supplementary_material [file attachment]

N\_adapt = 4

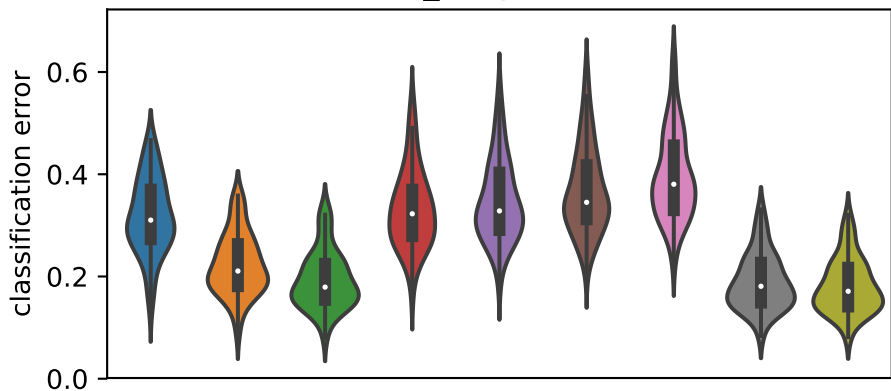

N\_adapt = 32

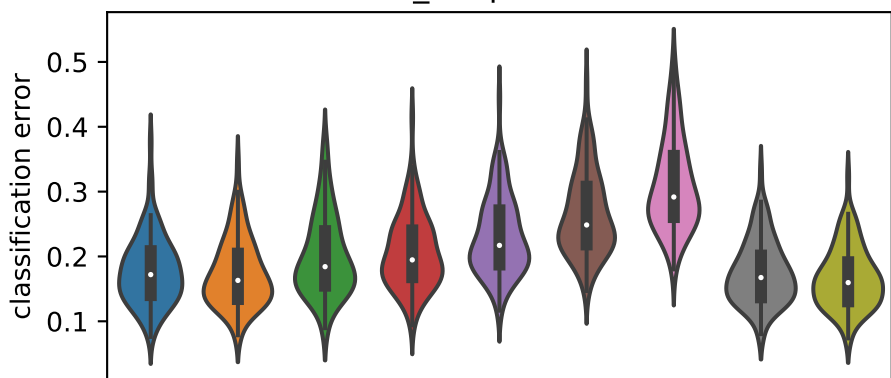

N\_adapt = 256

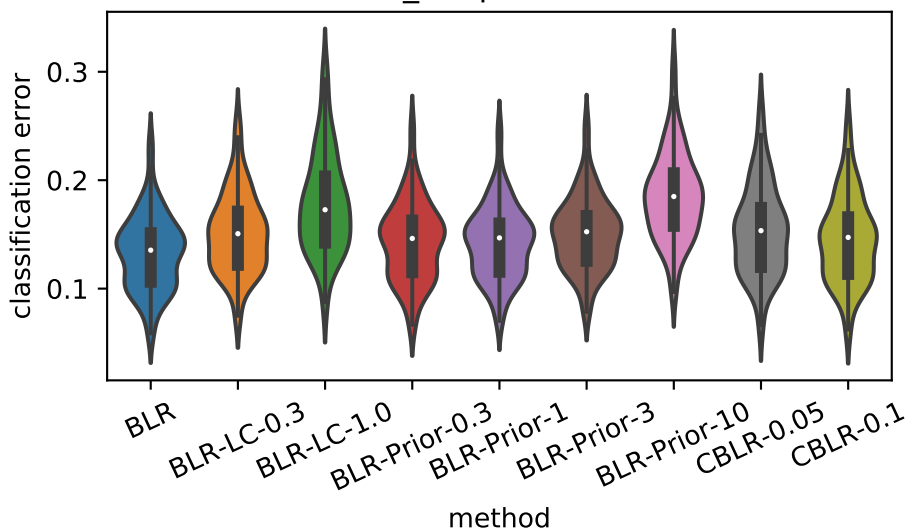

Supplement: supplementary_material [file attachment]

Regression

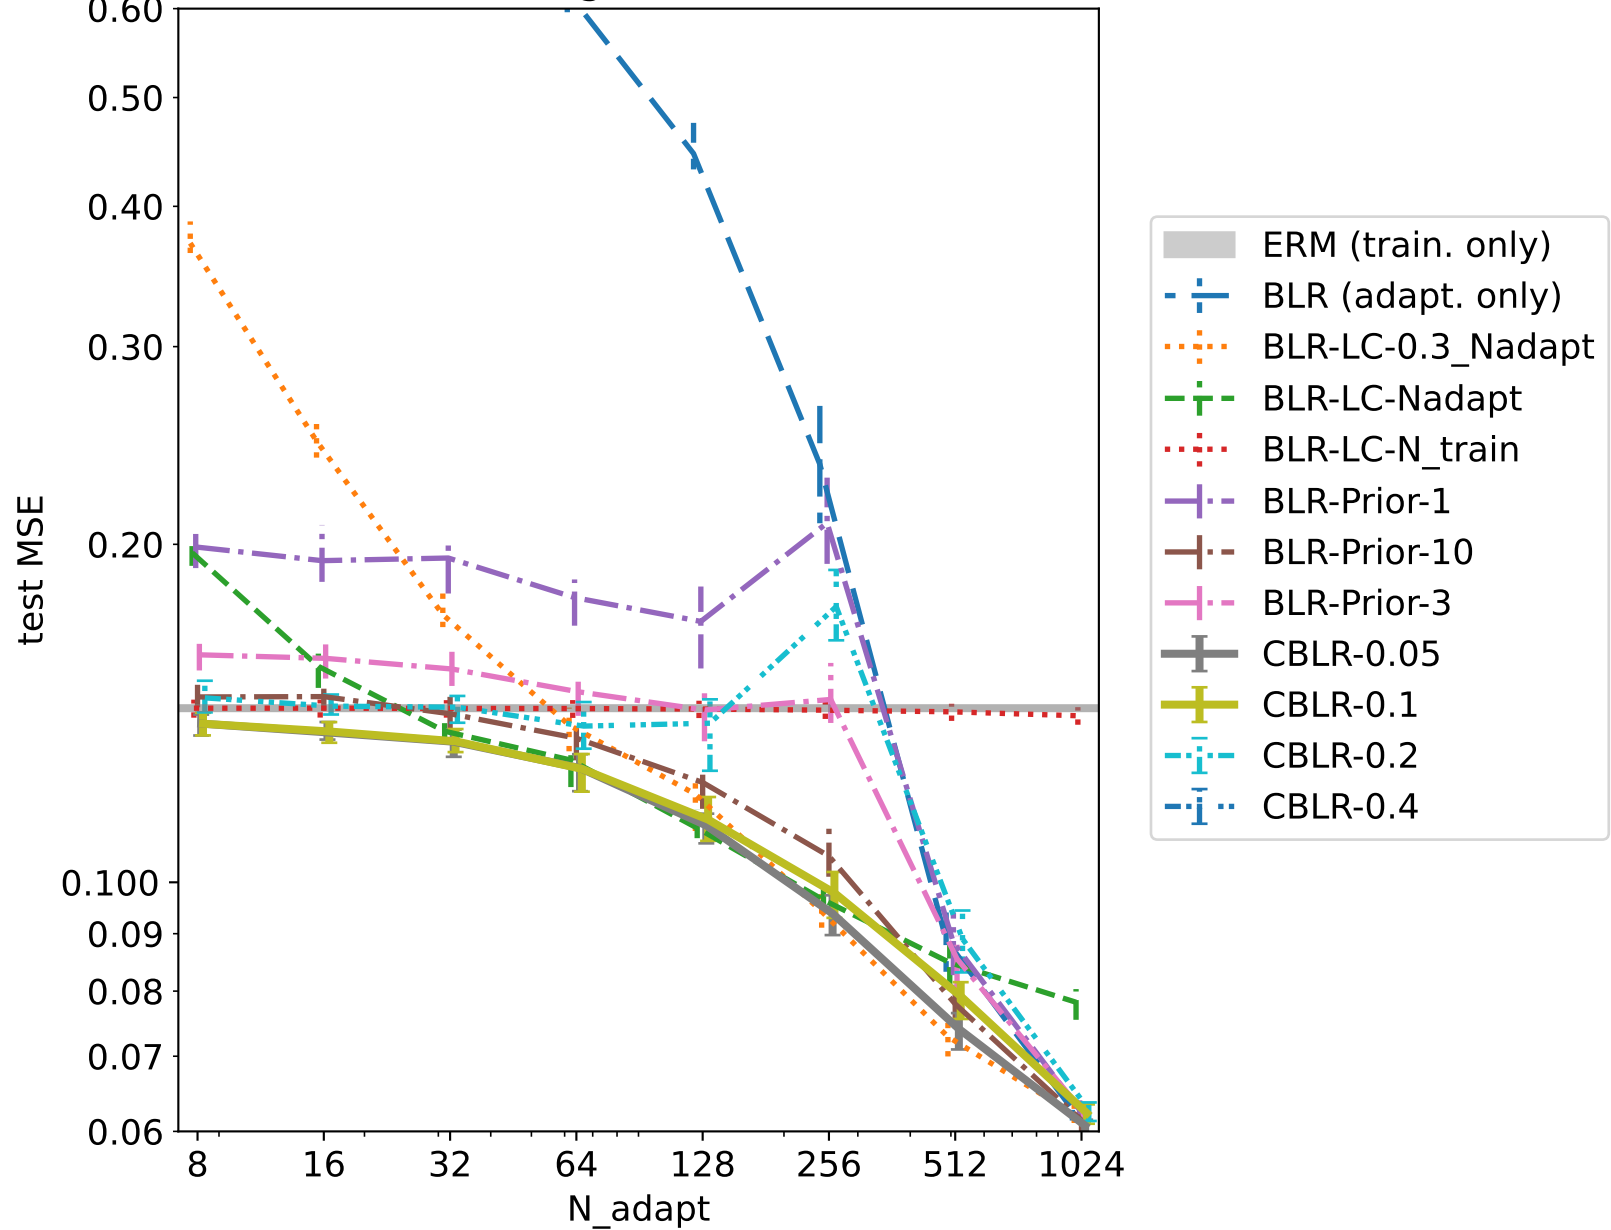

Supplement: supplementary_material [file attachment]

N\_adapt = 4

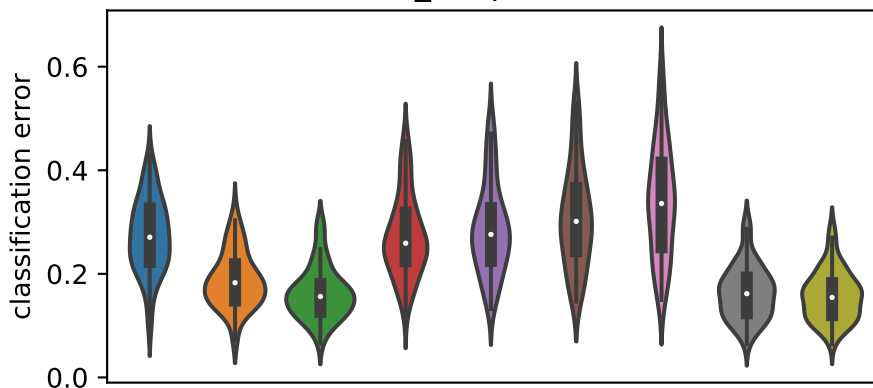

N\_adapt = 32

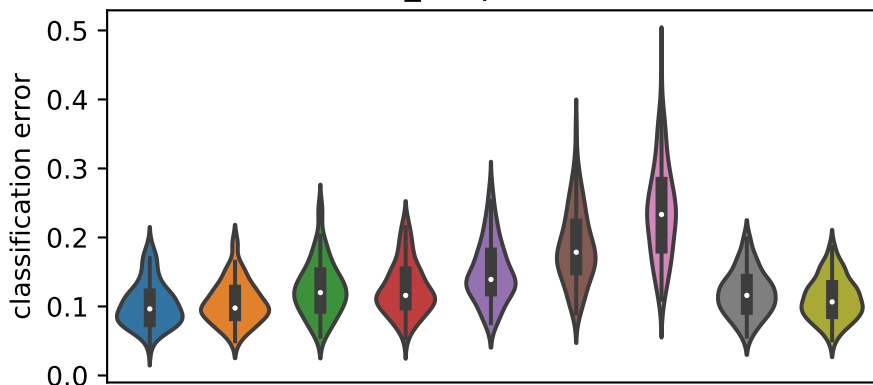

N\_adapt = 256

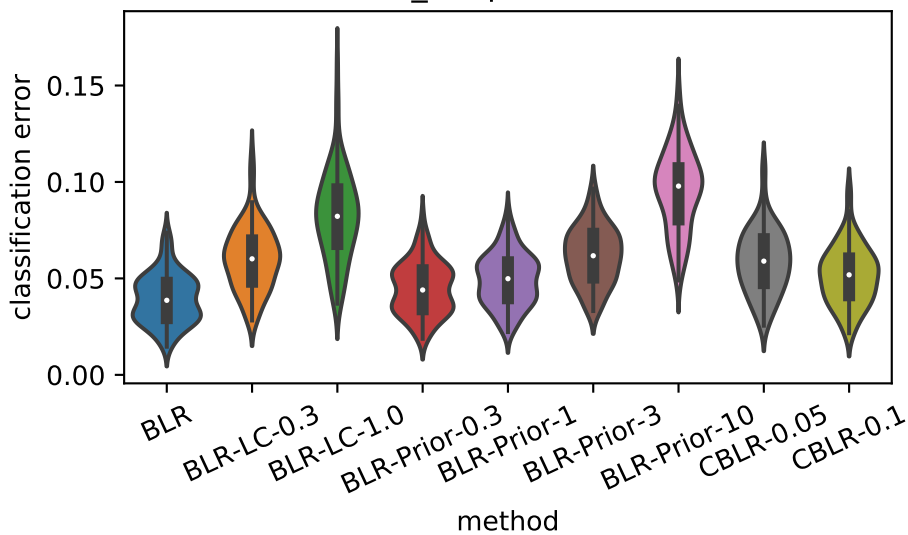

Supplement: supplementary_material [file attachment]

N\_adapt = 4

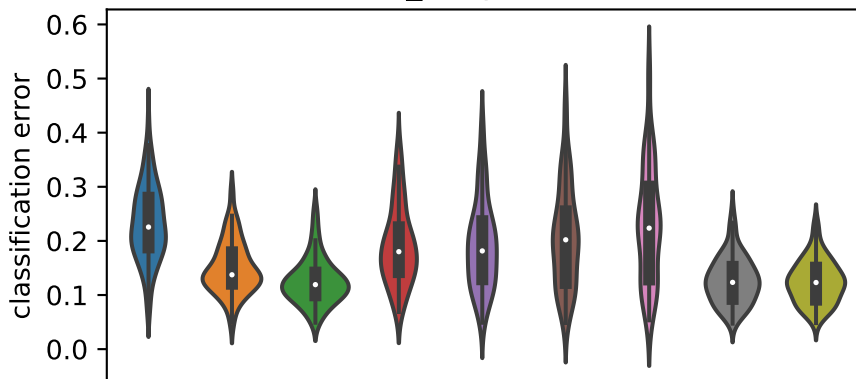

N\_adapt = 32

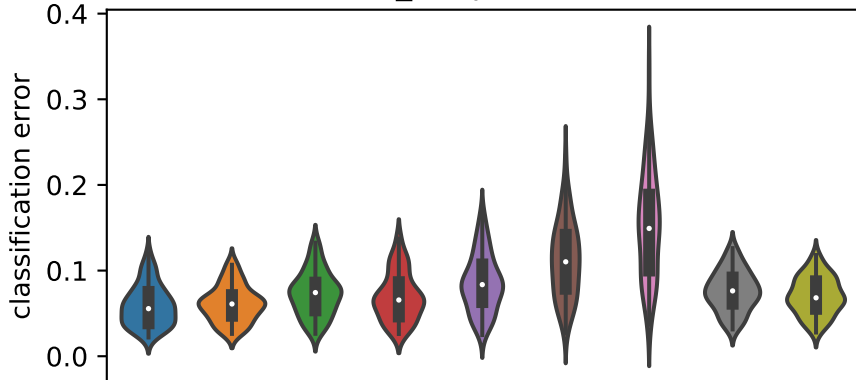

N\_adapt = 256

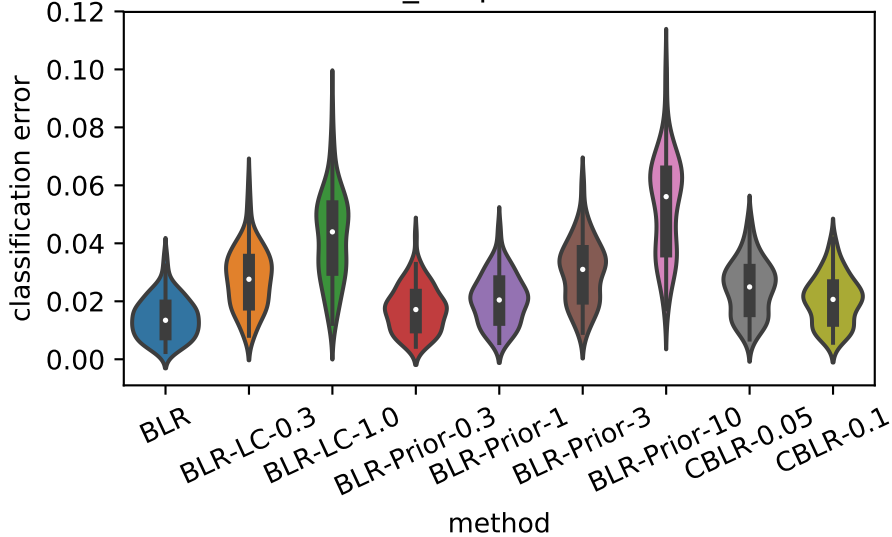

Supplement: supplementary_material [file attachment]

$N_{\text{adapt}} = 8$

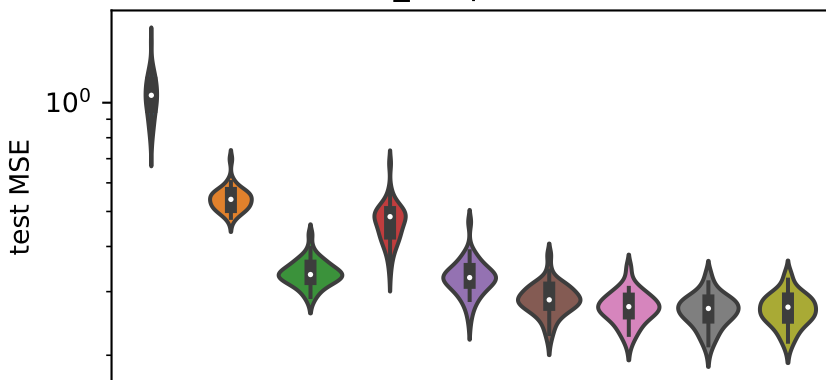

$N_{\text{adapt}} = 64$

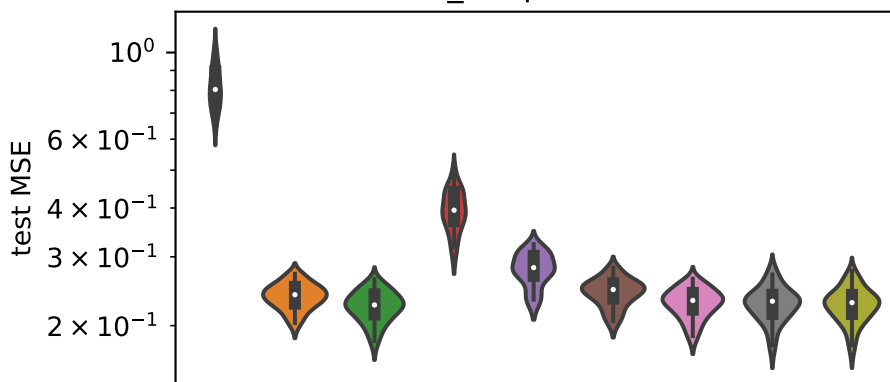

$N_{\text{adapt}} = 512$

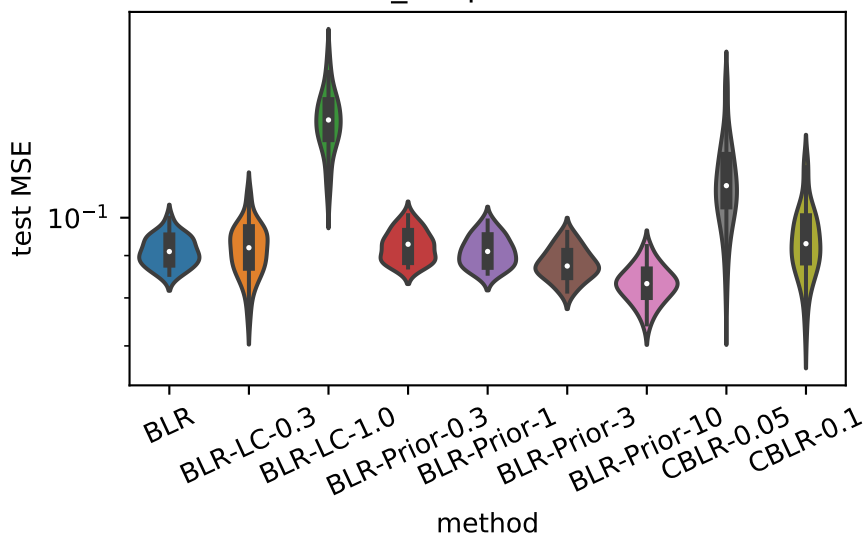

Supplement: supplementary_material [file attachment]

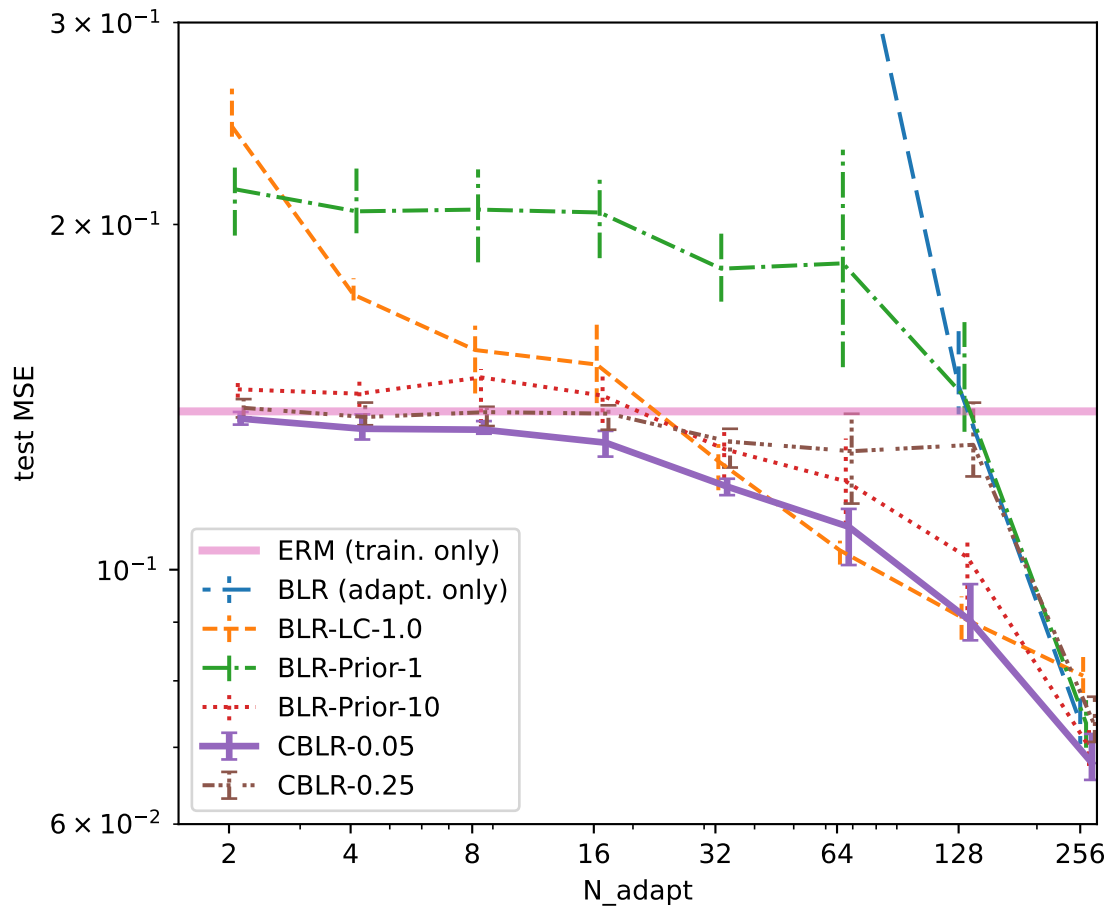

Supplement: supplementary_material [file attachment]

Classification

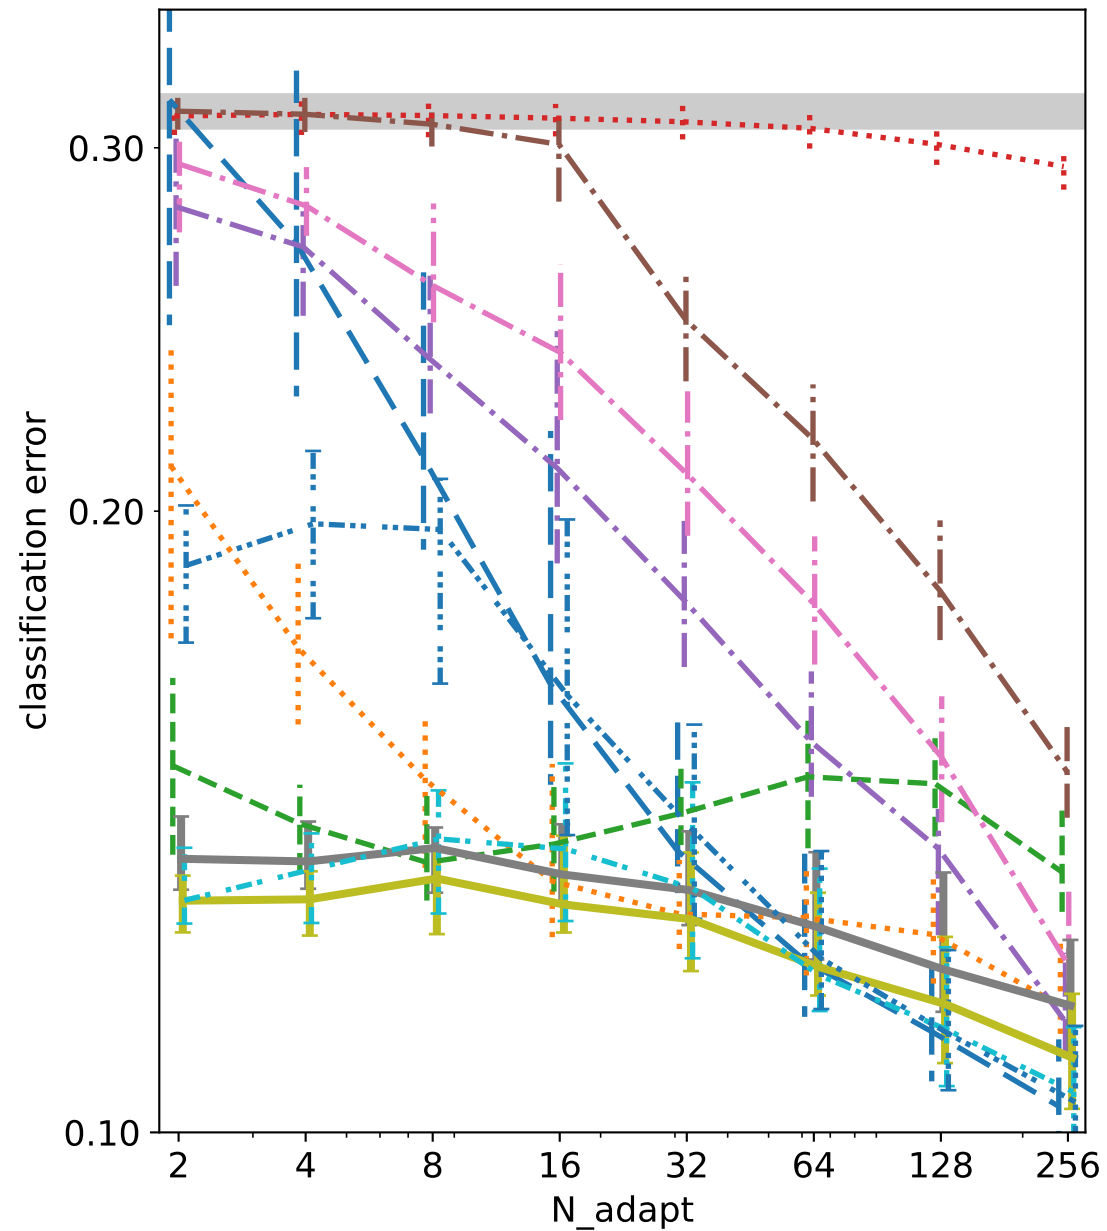

Regression

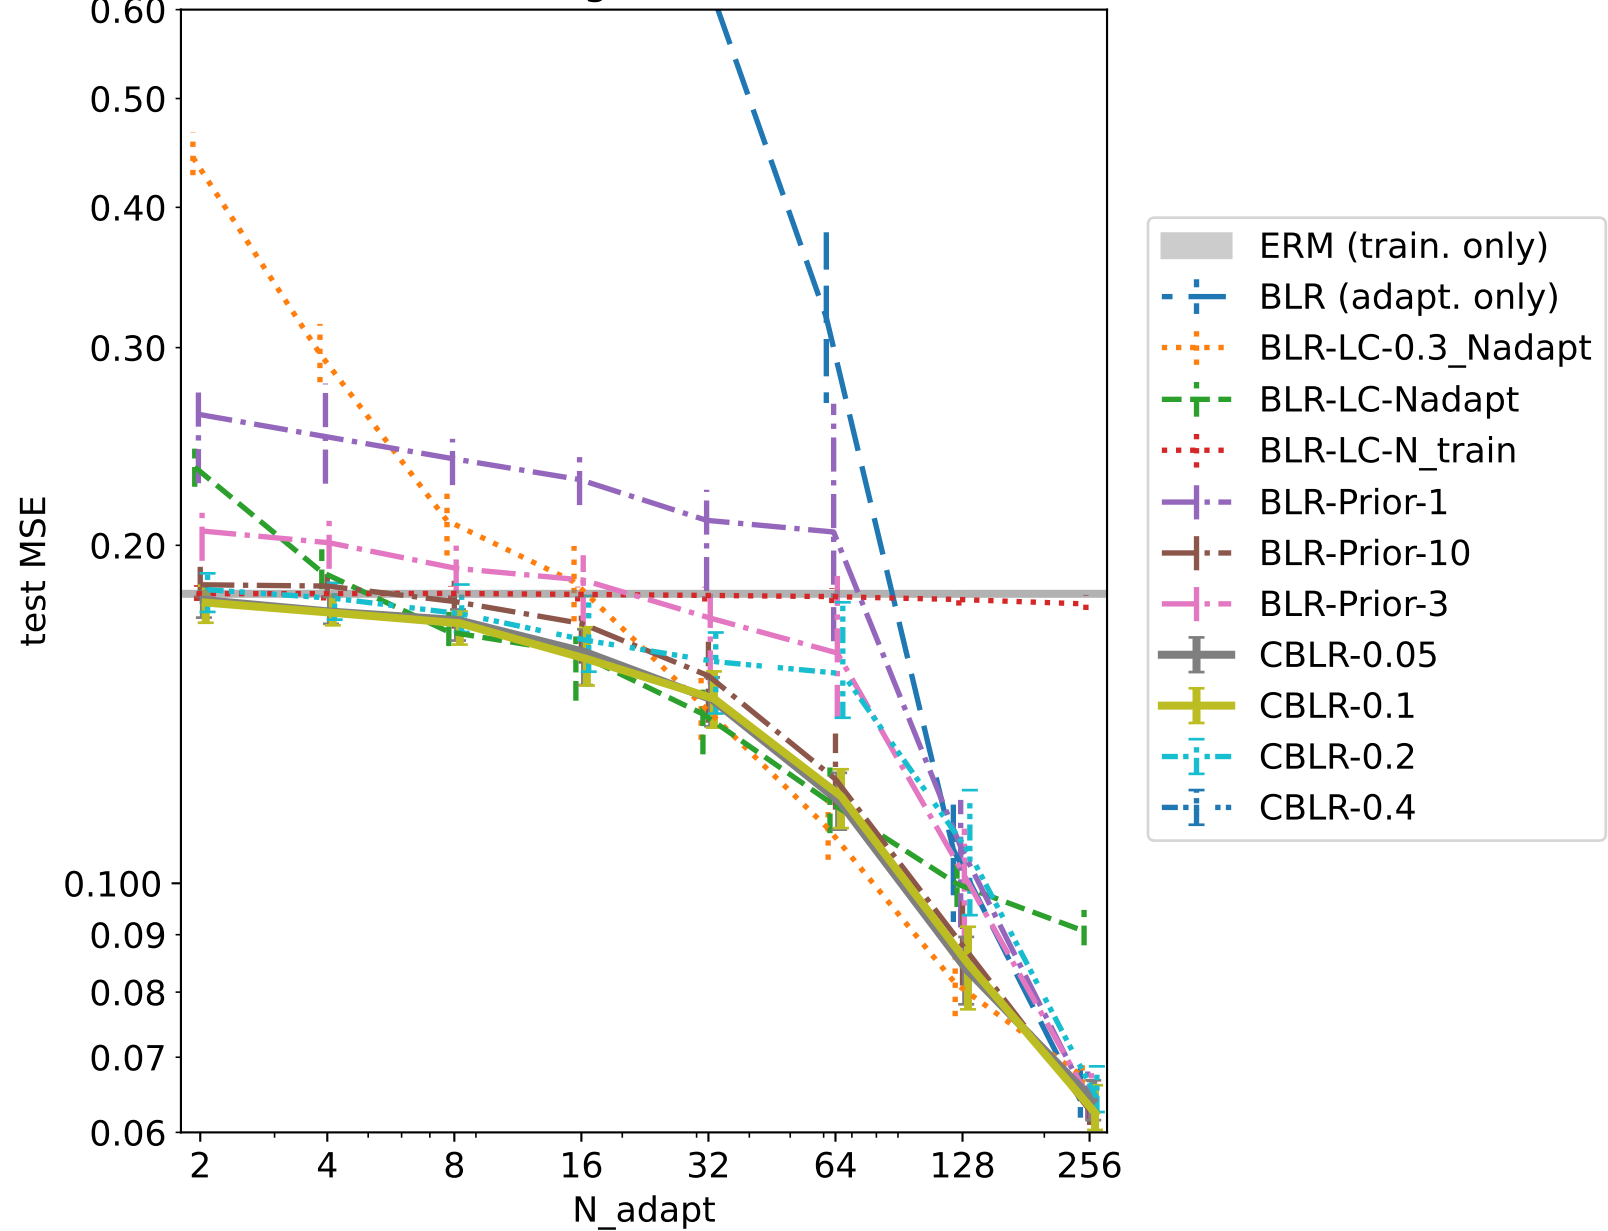

Supplement: supplementary_material [file attachment]

$N_{\text{adapt}} = 8$

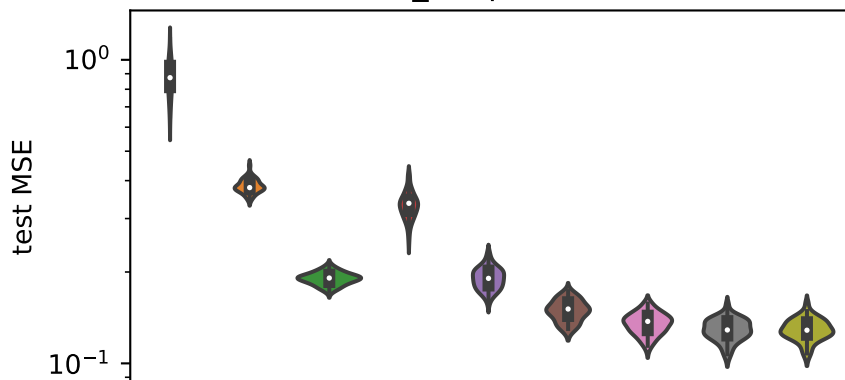

$N_{\text{adapt}} = 64$

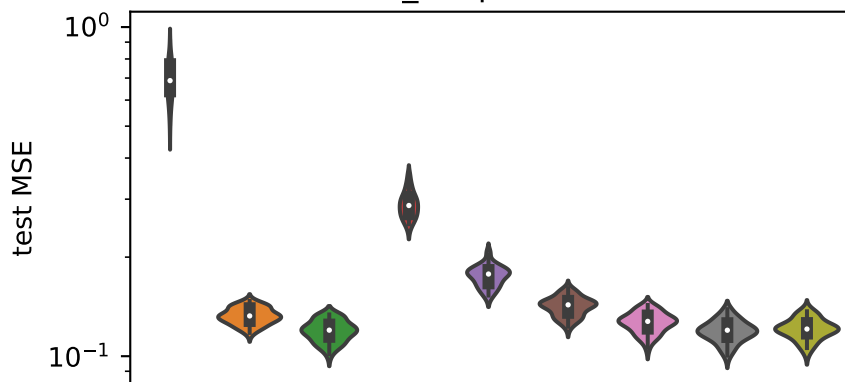

$N_{\text{adapt}} = 512$

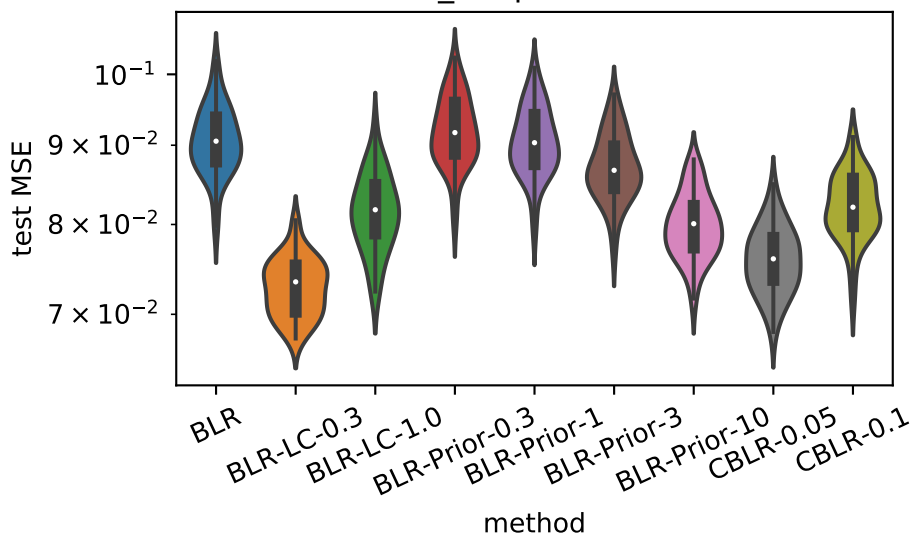

Supplement: supplementary_material [file attachment]

$N_{\text{adapt}} = 8$

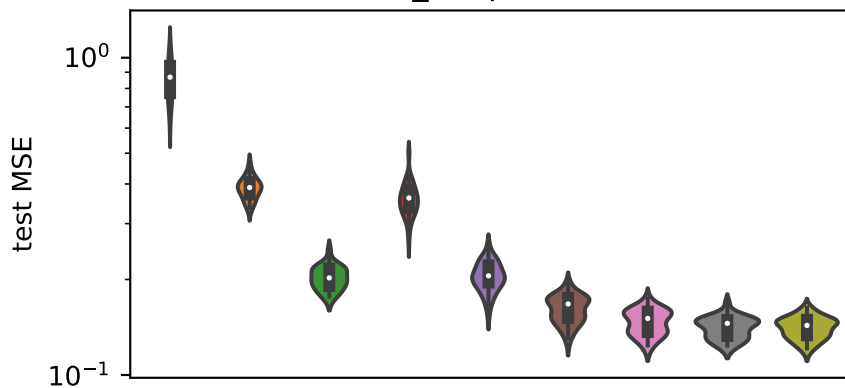

$N_{\text{adapt}} = 64$

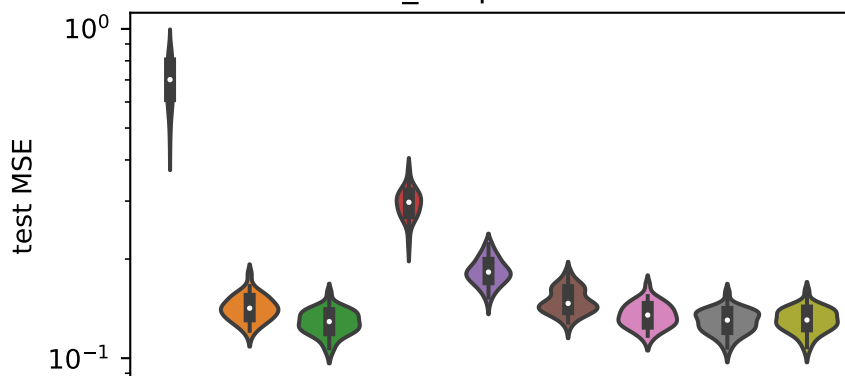

$N_{\text{adapt}} = 512$

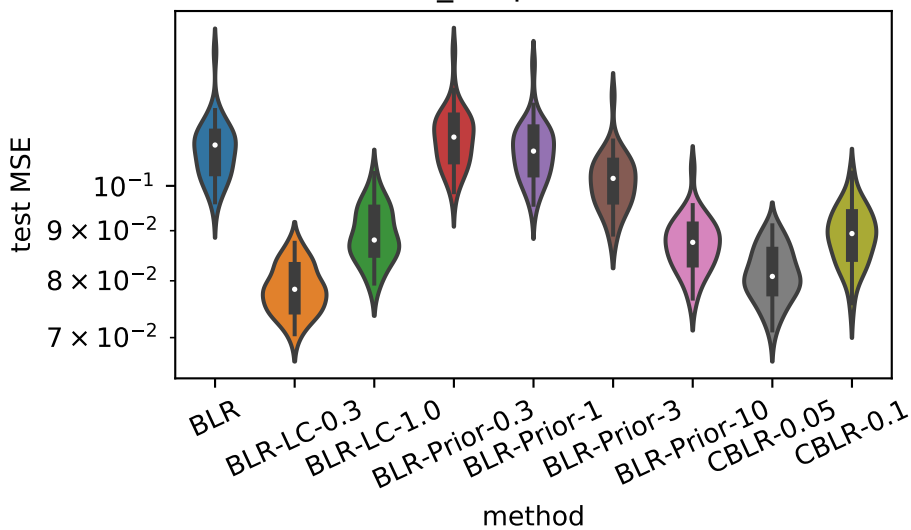

Supplement: supplementary_material [file attachment]
